# Supplementary material for: Organic/inorganic hybrid electrochromic devices based on photoelectrochemically formed polypyrrole/TiO2 nanohybrid films
Source: Royal Society of Chemistry journal article supplement (doi:10.1039/c2jm33135g), 2012-01-01
Supplement: c2jm33135g.pdf [file c2jm33135g.pdf]

## **Electronic Supplementary Information**

### **Organic/inorganic hybrid electrochromic devices based on photoelectrochemically formed polypyrrole/TiO<sub>2</sub> nanohybrid films**

**Shinya Takagi,<sup>a</sup> Satoshi Makuta,<sup>a,b</sup> Aisea Veamatahau,<sup>b</sup> Yasuhide Otsuka<sup>a</sup> and  
Yasuhiro Tachibana<sup>\*,a,b</sup>**

<sup>a</sup>*Center for Advanced Science and Innovation (CASI), Osaka University, 2-1 Yamada-oka,  
Suita, Osaka 565-0871, Japan*

<sup>b</sup>*School of Aerospace, Mechanical and Manufacturing Engineering, RMIT University, Bundoora,  
VIC 3083, Australia*

\*E-mail: [y.tachibana@casi.osaka-u.ac.jp](mailto:y.tachibana@casi.osaka-u.ac.jp); [yasuhiro.tachibana@rmit.edu.au](mailto:yasuhiro.tachibana@rmit.edu.au); phone +61 (0)3  
9925 6127; fax +61 (0)3 9925 6139

## Experimental

Absorbance by the TiO<sub>2</sub> film was qualitatively estimated by spectroelectrochemical measurements. The experiment was performed with the method described previously.<sup>1-3</sup> The TiO<sub>2</sub> film electrode was set to a three electrode cell with a quartz window, and placed in an absorption spectrometer (JASCO, V-670). Pt and Ag/AgCl electrodes were employed as counter and reference electrodes, respectively. Absorption spectra were observed after bias application into the TiO<sub>2</sub> film in 0.1 M KCl aqueous solution with a series of pH for 5 min. The solution pH was adjusted by adding HCl into the KCl solution, and was identical prior to and after the spectroelectrochemical experiments. The bias was applied from +0.2 V with -0.1 V steps following the measurement of the reference line after 15 min. stabilization at +1.0 V vs. Ag/AgCl. N<sub>2</sub> gas was employed prior to and during the optical experiments in order to avoid O<sub>2</sub> contamination.

## Results

Fig. S1 shows cyclic voltammograms of a TiO<sub>2</sub> electrode in 0.1 M KCl aqueous solution with a series of pH. The current density increased with decrease in the solution pH at the same applied voltage, clearly indicating the larger number of electronic states available to accept electrons. This also suggests that the same number of electronic states is available at more positively applied bias as the solution pH decreases.

These electronic states were monitored spectroelectrochemically. The difference spectra of the TiO<sub>2</sub> film, immersed in 0.1 M KCl with pH 4, under electrical bias application are shown in Fig. S2. Gradual increase in absorbance in the whole visible wavelength range was observed with negative bias applications. This absorbance change originates from the presence of Ti<sup>3+</sup> species, created by cathodic current flow to the TiO<sub>2</sub> electrode.<sup>4</sup> In contrast, negative absorbance change was observed at ~380 nm; this change is probably explained by

the band edge unpinning or the presence of an accumulation layer.<sup>4</sup> Following these bias dependent spectral changes, we chose a wavelength of 380 nm to monitor polypyrrole color change, since absorbance change of the TiO<sub>2</sub> is minimal.

Absorbance increase behavior with the negative bias application was compared by modifying pH in the electrolyte solution. Fig. S3 shows absorbance increase, monitored at 800 nm, as a function of the applied bias in the electrolyte with a variety of pH. As the solution pH decreases, the absorbance change at the identical applied bias increases and the onset potential shifts positively, in agreement with the previous report.<sup>5, 6</sup> These data suggest that a density of electron acceptor states inside the TiO<sub>2</sub> film at the identical applied bias increases with the solution pH decrease. Thus, an electron can be conducted inside the TiO<sub>2</sub> film at relatively positive potential by employing the aqueous electrolyte with low pH.

## References

- 1 G. Boschloo and D. Fitzmaurice, *J. Phys. Chem. B*, 1999, **103**, 7860-7868.
- 2 R. van de Krol, A. Goossens and E. A. Meulenkaamp, *J. Appl. Phys.*, 2001, **90**, 2235-2242.
- 3 R. L. Willis, C. Olson, B. O'Regan, T. Lutz, J. Nelson and J. R. Durrant, *J. Phys. Chem. B*, 2002, **106**, 7605-7613.
- 4 F. Cao, G. Oskam, P. C. Searson, J. M. Stipkala, T. A. Heimer, F. Farzad and G. J. Meyer, *J. Phys. Chem.*, 1995, **99**, 11974-11980.
- 5 B. Enright and D. Fitzmaurice, *J. Phys. Chem.*, 1996, **100**, 1027-1035.
- 6 G. Rothenberger, D. Fitzmaurice and M. Grätzel, *J. Phys. Chem.*, 1992, **96**, 5983-5986.

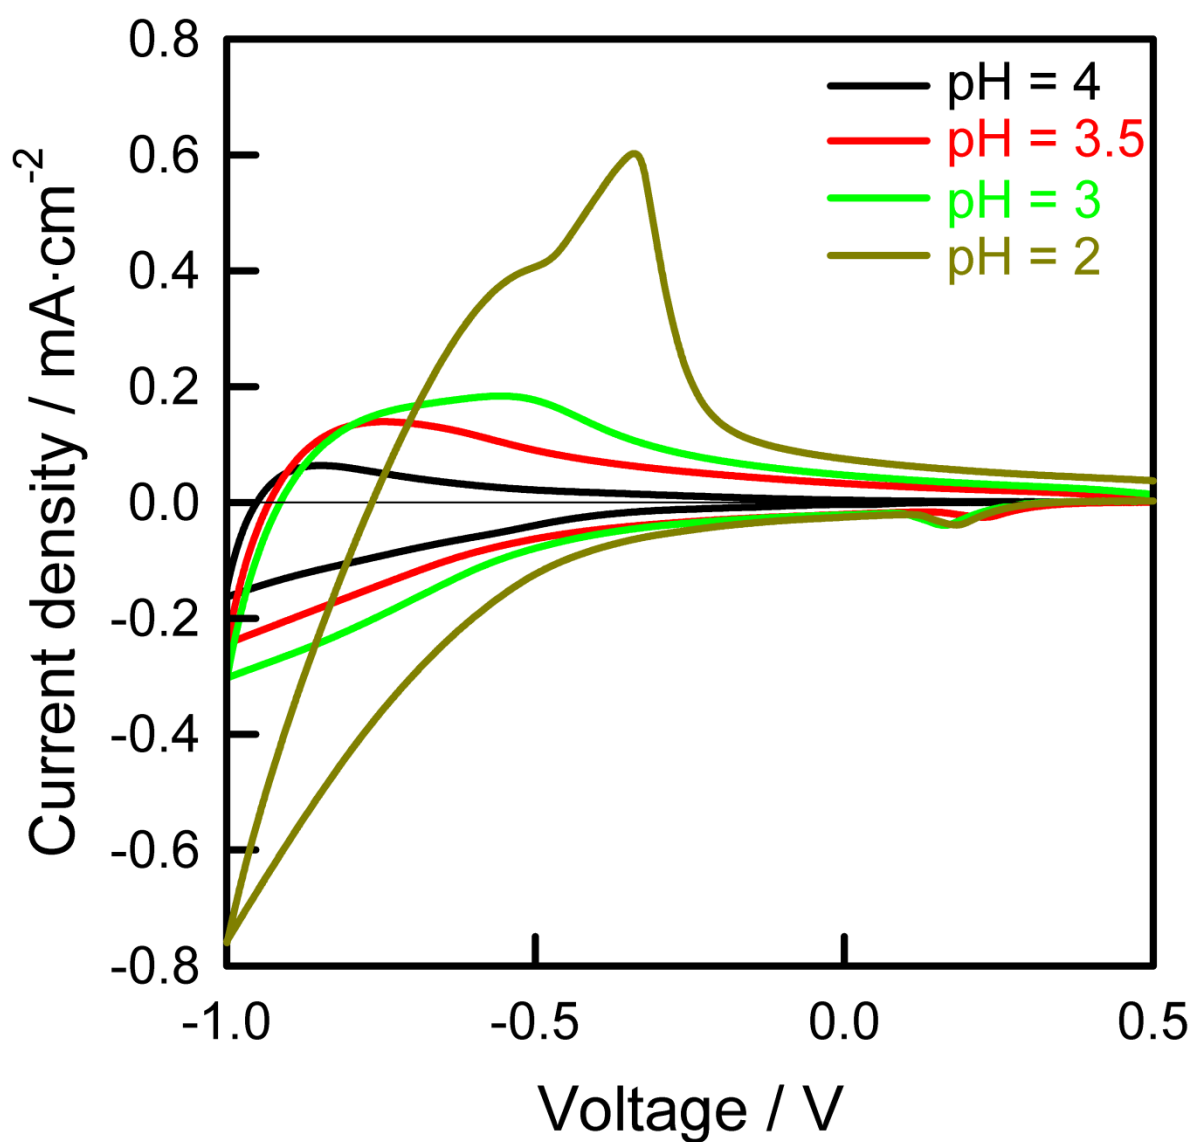

**Fig. S1** Cyclic voltammograms of nanocrystalline TiO<sub>2</sub> electrode in 0.1 M KCl aqueous solution with a series of pH. The scan rate is 20 mV s<sup>-1</sup>.

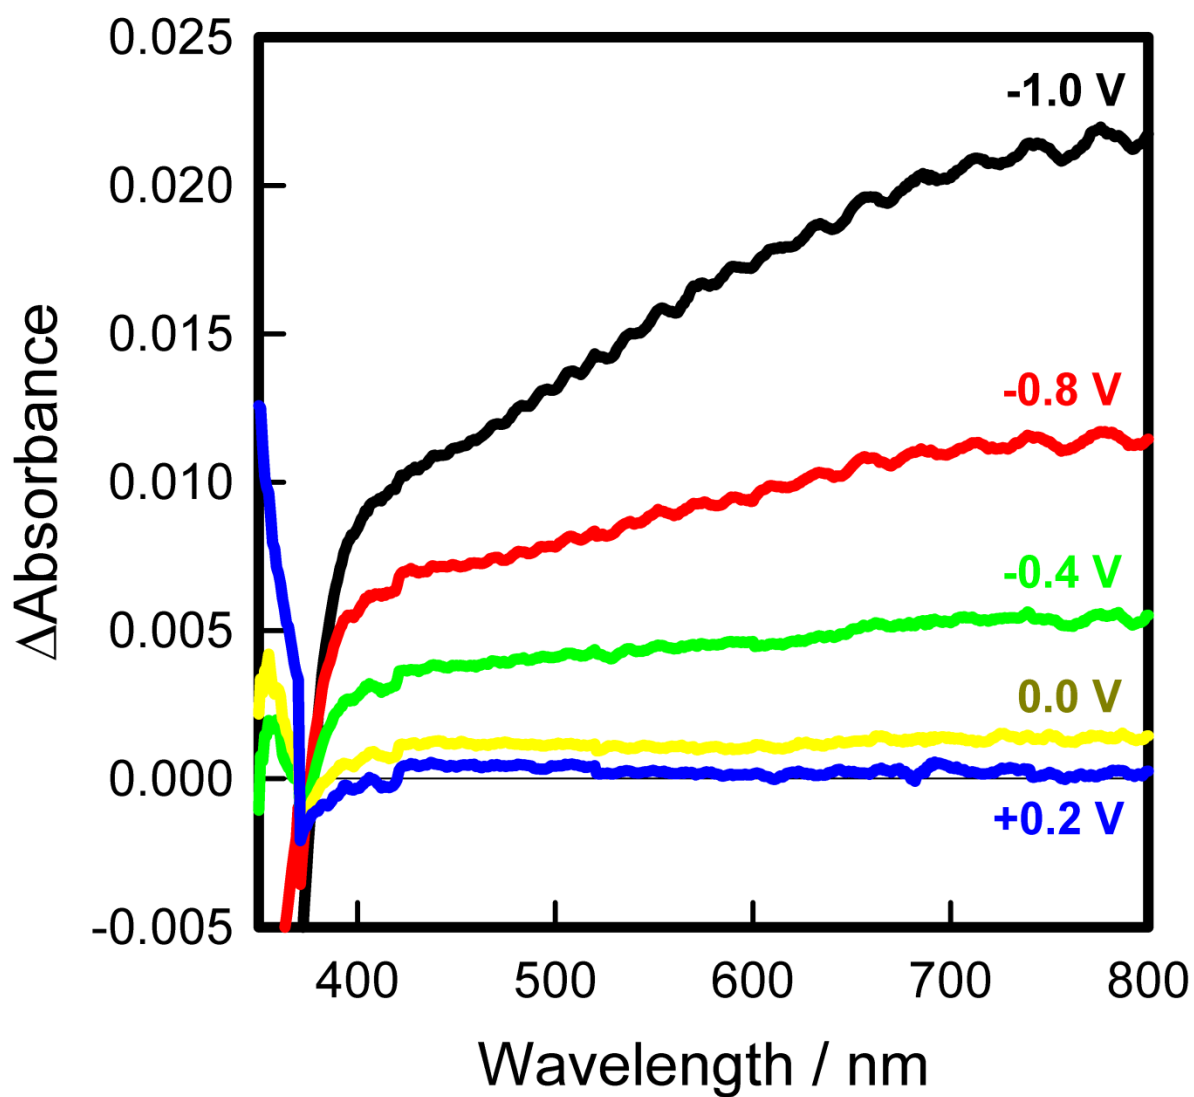

**Fig. S2** Absorbance difference spectra of a  $\text{TiO}_2$  film in 0.1 M KCl aqueous solution with pH 4 under electrical bias application.

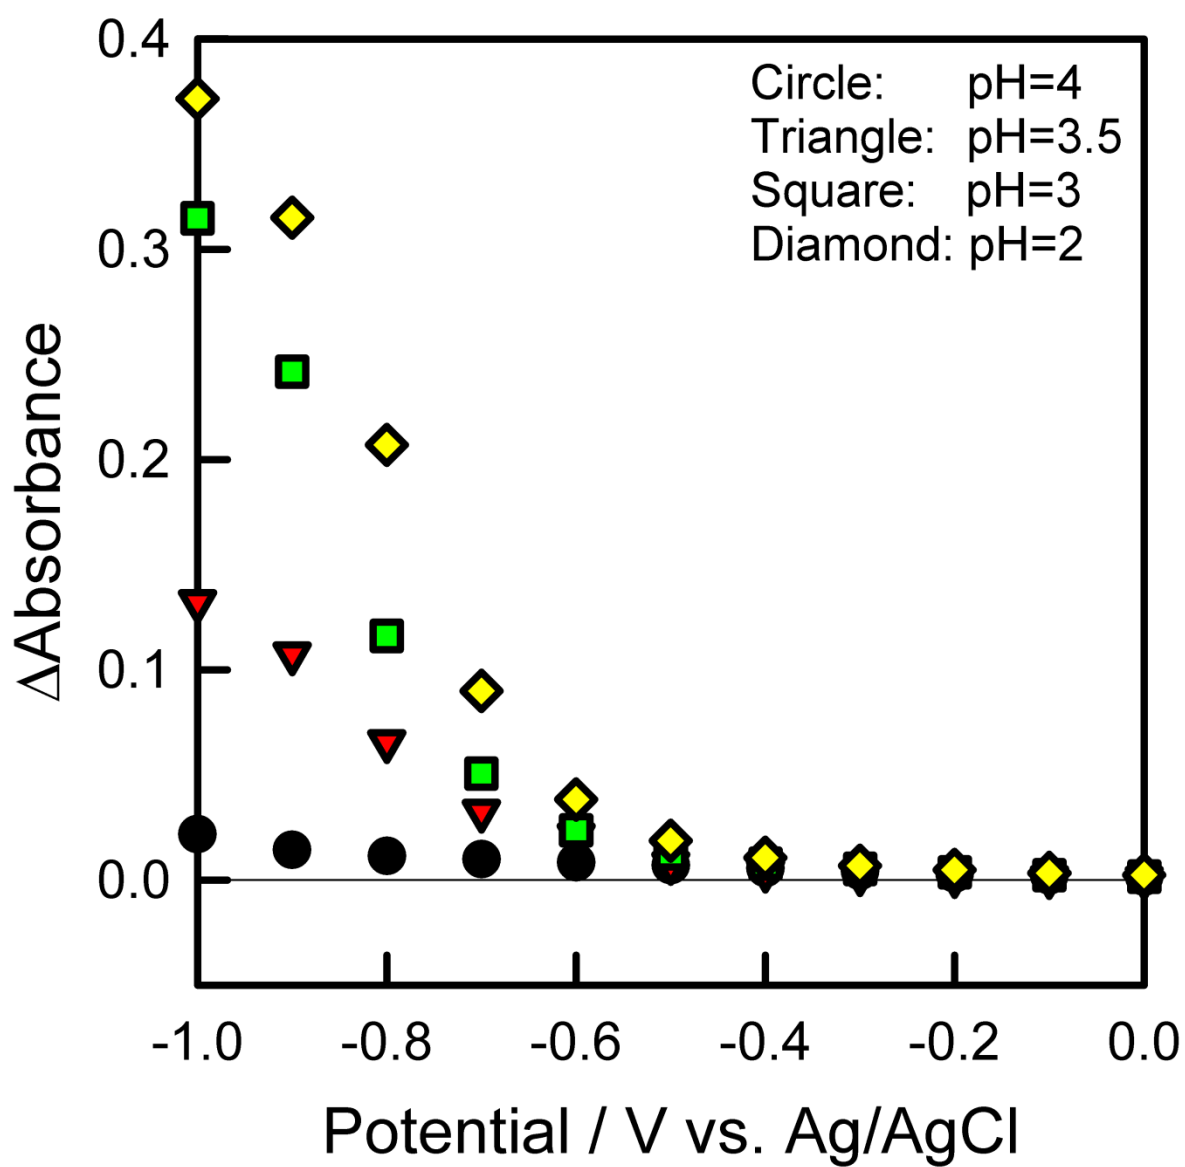

**Fig. S3** Absorbance difference of a TiO<sub>2</sub> film in 0.1 M KCl aqueous solution with a series of pH, monitored at 800 nm, under electrical bias application.
