# Supplementary material for: Organic/inorganic hybrid electrochromic devices based on photoelectrochemically formed polypyrrole/TiO2 nanohybrid films
Source: Royal Society of Chemistry journal article supplement (doi:10.1039/c2jm33135g), 2012-01-01
Supplement: c2jm33135g_2.pdf [file c2jm33135g_2.pdf]

## Multimedia file description

### Short descriptive title:

Pattern electrochromic movie of a photoelectrochemically formed polypyrrole/TiO<sub>2</sub> nanohybrid film

### Movie legend:

The nanohybrid pattern film indicates swift pattern electrochromic reactions by applying alternate electrical bias to the film at +0.5 V and -1.0 V vs. Ag/AgCl every 2 s.

### Keywords:

Pattern electrochromism, polypyrrole/TiO<sub>2</sub> nanohybrid, photoelectrochemical formation, alternate electrical bias application, swift electrochromic response
